# Supplementary material
Source: PubMed Central journal article supplement (PMC3322887)

## Supplemental Data

### SUPPLEMENTAL FIGURE LEGENDS

**Supplemental Figure 1.** Residue Ala<sup>213</sup> of methylated His<sub>6</sub>-PR and its nearby region. The residues Pro<sup>206</sup> and Ile<sup>207</sup> (stick presentation, in green) are most closely positioned to Ala<sup>213</sup> (stick presentation, in purple) in the neighboring symmetry molecule. The shortest distances between the Ala<sup>213</sup> side chain carbon and Pro<sup>206</sup> and Ile<sup>207</sup> are 3.47 Å and 3.57 Å, respectively.

**Supplemental Figure 2.** Size exclusion chromatogram of methylated and un-methylated His<sub>6</sub>-PR. *Aspergillus niger* glucose oxidase (150 kDa), BSA (67 kDa), ovalbumin (45 kDa) and α-Chymotrypsin (25 kDa), were used to create the calibration curve (dark blue). Un-methylated His<sub>6</sub>-PR (5 mg/ml) shows two peaks in the chromatograph (blue). The major peak at 65 ml elution volume represents the monomeric form of PR in solution. The corresponding molecular weight of ~38 kDa is consistent with findings from SDS-PAGE (data not shown). The second peak at 56 ml elution volume (~72 kDa) indicates the dimeric form of PR in solution. According to the peak area, the ratio between monomer and dimer is around 4:1. Methylated His<sub>6</sub>-PR (5 mg/ml) shows a single peak (pink), indicating that methylated PR exists only as monomer in solution, and the molecular weight is ~48 kDa.

**Supplemental Figure 3.** NADPH binding site. All the surrounding residues (Ser<sup>205</sup>, Gly<sup>208</sup>, Gly<sup>279</sup>, Thr<sup>280</sup>, Thr<sup>281</sup>, Lys<sup>282</sup>, Asn<sup>285</sup>, Asn<sup>288</sup>, and Asn<sup>289</sup>) that were observed to form hydrogen bonds with the cofactor NADPH (stick presentation in green) are shown in white stick presentation. The hydrogen bonds are represented by dashed black lines.

**Supplemental Figure 4.** Two symmetric holo His<sub>6</sub>-PR-A213W molecules in the crystal packing. Active sites were occupied by the neighbour symmetry molecule. The catalytic tetrad (Asp<sup>52</sup>, Tyr<sup>57</sup>, Lys<sup>84</sup> and His<sup>126</sup>) is in red. NADPH is in green stick presentation, and the modeled nicotinamide riboside part of NADPH is shown in black.

**Supplemental Figure 5.** Structural comparison of PR and a "generic" AKR to display the diversity in the C-terminus. *A.* The orientation of PR model to depict the decoration of the five additional β-strands (OOB1-5, purple) at C-terminus. OOB = out of barrel. *B.* A "generic" AKR (3α-Hydroxysteroid dehydrogenase, PDB 1WLI) (38) with the same orientation as *A.* β1 and β8 which are missing in PR are in blue. The missing residues in Loop B are represented by dashed black lines. Loop A-C are in green. N- and C-terminus are marked with N and C.

**Supplemental TABLE 1A***MAD data collection and phasing statistics of methylated His<sub>6</sub>-PR*

|                                                   | Peak         | Inflection                 | High remote  |
|---------------------------------------------------|--------------|----------------------------|--------------|
| Wavelength (Å)                                    | 1.0723       | 1.0726                     | 0.9537       |
| $R_{\text{merge}}$ (%) <sup>a</sup>               | 6.7 (59.9)   | 7.8 (83.2)                 | 8.1 (62.5)   |
| Completeness (%)                                  | 96.8 (90.4)  | 97.7 (95.7)                | 98.3 (95.2)  |
| Multiplicity                                      | 2.13 (2.05)  | 2.14 (2.09)                | 4.18 (3.76)  |
| $I/\sigma(I)$                                     | 11.13 (1.77) | 10.32 (1.38)               | 14.87 (2.66) |
| Resolution (Å)                                    |              | 20-2.50 (2.50-2.63)        |              |
| Unit cell (Å)                                     |              | a=60.52, b=91.83, c=143.81 |              |
| Space Group                                       |              | C222 <sub>1</sub>          |              |
| <b>SHELXD</b>                                     |              |                            |              |
| Highest resolution for sub-structure solution (Å) |              | 3.7                        |              |
| CC all <sup>b</sup>                               |              | 47.71                      |              |
| No. of Pt sites                                   |              | 2                          |              |
| <b>SHELXE</b>                                     |              |                            |              |
| Solvent content                                   |              | 0.55                       |              |
| Contrast                                          |              | 0.634                      |              |
| Connectivity                                      |              | 0.750                      |              |
| Pseudo-Free CC (%) <sup>c</sup>                   |              | 65.26                      |              |

<sup>a</sup> $R_{\text{merge}} = |I_i - \langle I_i \rangle| / I_i$ ,  $I_i$  is the average intensity value of the equivalent reflections.

## Supplemental TABLE 1B

X-ray data collection and refinement statistics of methylated apo His<sub>6</sub>-PR-A213W and un-methylated His<sub>6</sub>-PR-A213W complex with NADPH

| Structure                                              | mPR-A213W <sup>a</sup>         | PR-A213W+NADPH <sup>b</sup> |
|--------------------------------------------------------|--------------------------------|-----------------------------|
| <b>Data collection</b>                                 |                                |                             |
| Wavelength (Å)                                         | 1.0                            | 1.0                         |
| Total reflections                                      | 58206                          | 132770                      |
| Unique reflections                                     | 20584                          | 14294                       |
| Mosaicity                                              | 0.641                          | 0.241                       |
| Resolution (Å)                                         | 40-2.20 (2.32-2.20)            | 20-2.33 (2.41-2.33)         |
| Completeness (%)                                       | 95.4 (84.0)                    | 99.6 (96.0)                 |
| $I/\sigma(I)$                                          | 27.8 (3.1)                     | 45 (2.5)                    |
| $R_{\text{merge}}$ (%) <sup>c</sup>                    | 5.8 (17.9)                     | 7.9 (61.4)                  |
| Space Group                                            | C222 <sub>1</sub>              | P3 <sub>2</sub> 21          |
| Unit cell (Å)                                          | a = 58.09, b = 93.6 c = 142.98 | a = b = 54.5, c = 200.4     |
| <b>Refinement statistics</b>                           |                                |                             |
| $R_{\text{work}}^d/R_{\text{free}}^e$ (%) <sup>c</sup> | 21.2/24.7                      | 21.5/25.4                   |
| No. of protein atoms                                   | 2188                           | 2227                        |
| No. of water molecules                                 | 69                             | 26                          |
| No. of NADP <sup>+</sup> atoms                         |                                |                             |
| R.M.S.D. <sup>f</sup> Bond length (Å)                  | 0.008                          | 0.008                       |
| R.M.S.D. <sup>f</sup> Bond angle (°)                   | 1.093                          | 1.299                       |
| <b>Average B-factors (Å<sup>2</sup>)</b>               |                                |                             |
| Protein                                                | 54.2                           | 45.4                        |
| Water                                                  | 51.1                           | 45.1                        |
| NADP <sup>+</sup>                                      |                                | 44.4                        |
| <b>Ramachandran analysis (%)</b>                       |                                |                             |
| Most favored region                                    | 94.2                           | 95.3                        |
| Allowed                                                | 4.7                            | 4.3                         |
| Disallowed                                             | 1.1                            | 0.4                         |
| <b>PDB code</b>                                        | 3V0U                           | 3V0T                        |

<sup>a</sup>mPR-A213W: methylated His<sub>6</sub>-PR-A213W mutant;

<sup>b</sup>PR A213W +NADPH: unmethylated His<sub>6</sub>-PR-A213W complexed with NADPH;

<sup>c</sup> $R_{\text{merge}} = |I_i - \langle I_i \rangle|/I_i$ ,  $I_i$  is the average intensity value of the equivalent reflections;

<sup>d</sup> $R_{\text{work}} = \Sigma(|F_o - F_c|)/\Sigma|F_o|$ ,  $F_o$  and  $F_c$  are observed and calculated structure factors, respectively.

<sup>e</sup> $R_{\text{free}}$  was calculated using 5 % randomly excluded data from refinement.

<sup>f</sup>R.M.S.D.: root mean square deviation.

**Supplemental Figure 1**

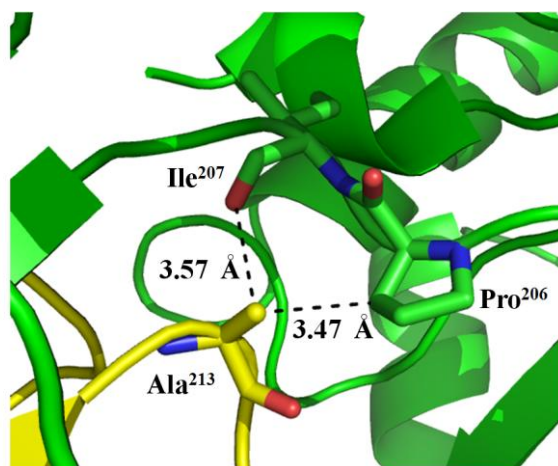

**Supplemental Figure 2**

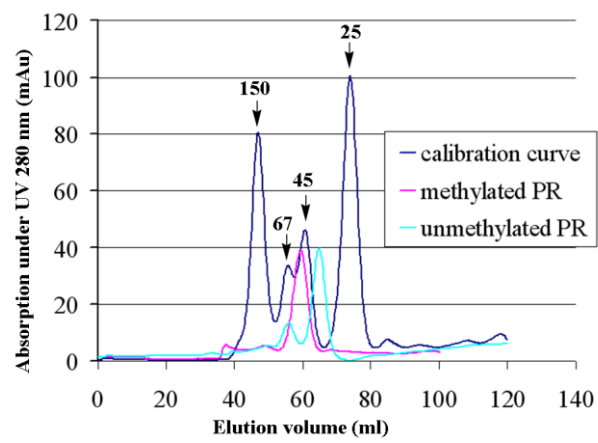

**Supplemental Figure 3**

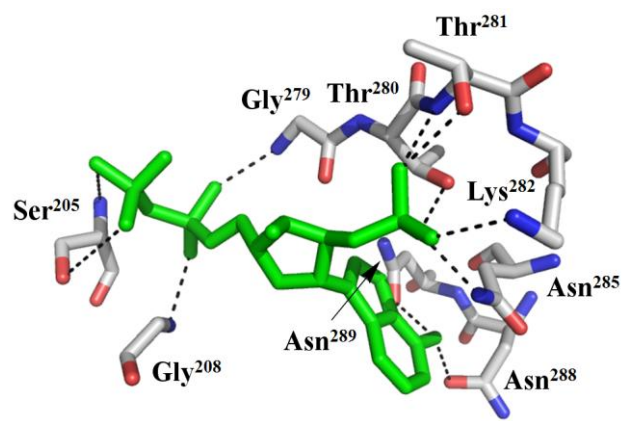

**Supplemental Figure 4**

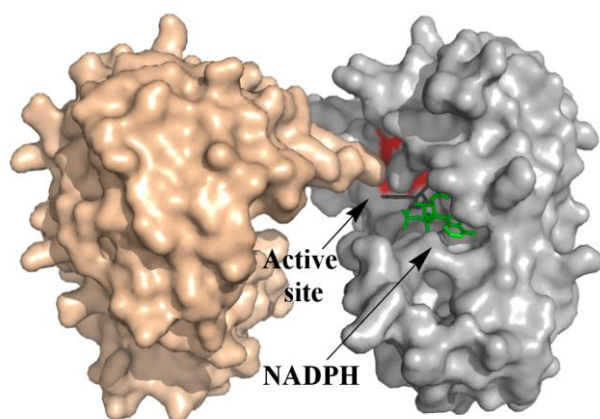

Supplemental Figure 5

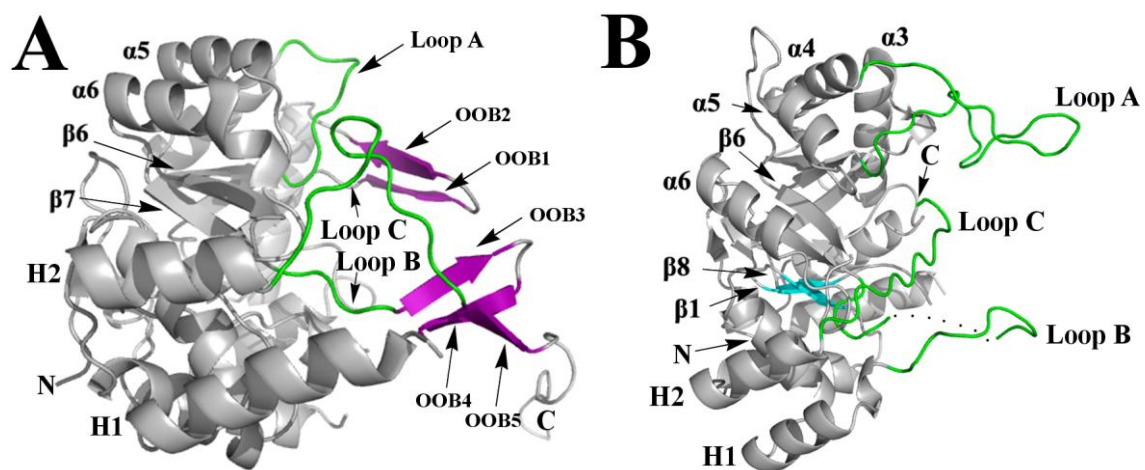

Supplement: supp_M111.335521_jbc.M111.335521-1.pdf [file supp_M111.335521_jbc.M111.335521-1.pdf]
